# Supplementary material
Source: Springer Nature journal article supplement (https://www.springermedizin.de/resource/supplementary/13058_2013_3447_MOESM5_ESM.pdf/9704024)

**A**

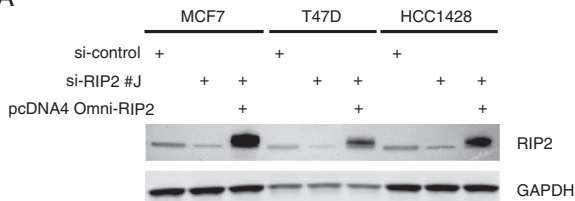

**B**

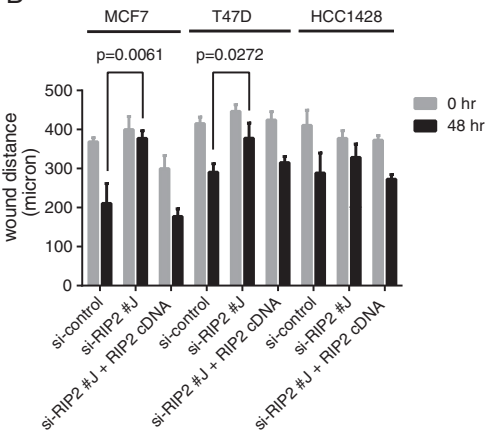

**C**

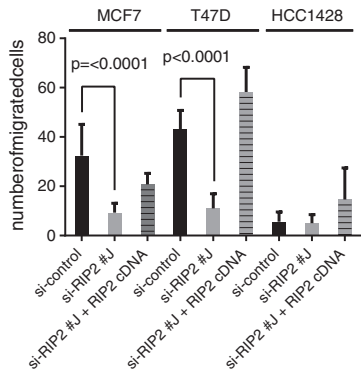

Supplement: MOESM5 [file 9704024]
